# Supplementary material
Source: PubMed Central journal article supplement (PMC2707203)
Supplement: supp_M109.013813_Suppdata.pdf [file supp_M109.013813_Suppdata.pdf]

**Supplement Fig-1:** Confocal microscopic images of HAS1-FL and HAS1-Vs expression in KMS-12BM cells: Localization of individual proteins (red) in KMS-12BM cells transfected with indicated plasmids.

**Supplement Fig-2:** Co-localization pattern of HAS1-FL and HAS1-Vs (green) and Golgi body (Gb) targeted pmCherry (red) in HeLa and KMS-12BM cells.

**Supplement Fig-3:** Co-localization of HAS1-FL (green) and HAS1-Vs (red) in transfected KMS-12BM cells. In the first panel HAS1-FL was expressed as equal mixture of two N-terminally fused tag proteins.

**Supplement Fig-4:**

To authenticate reagents used in Fig-5C, mouse IgG was diluted in extraction buffer at 50 µg/ml and treated with loading dye with or without βME, run on 6% native PAGE and immunoblotted with anti-mouse IgG-HRP. Multiple disulfide bonds present in IgG were reduced with βME to separate heavy (~55KD) and light chains (run out of the gel).

**KMS12**

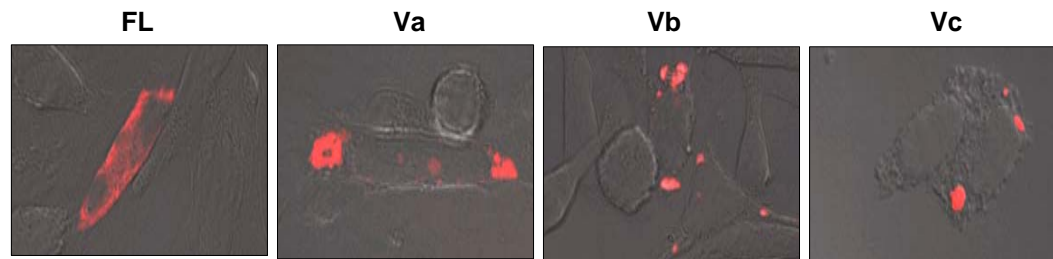

**Supplement Fig-1**

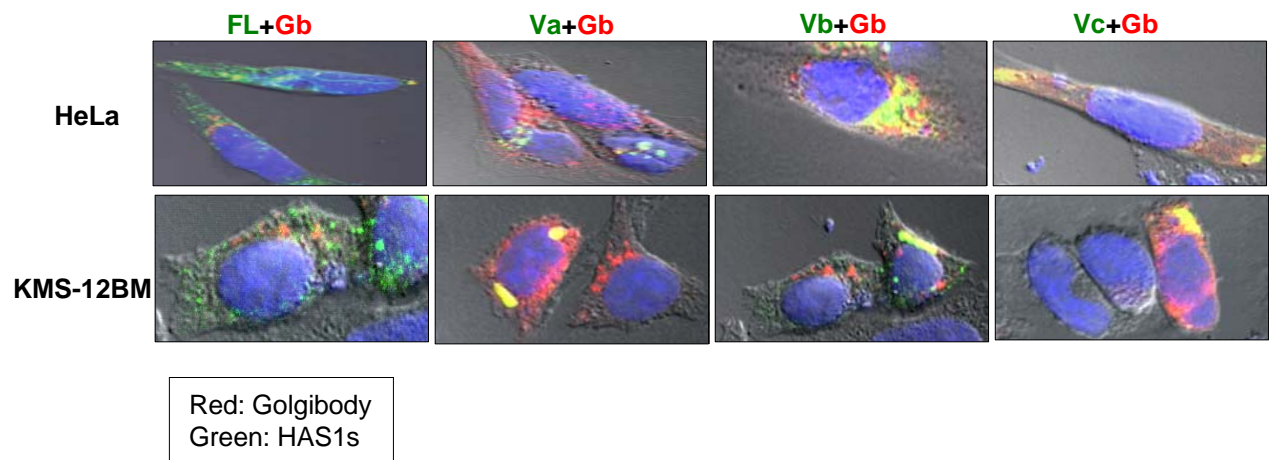

Supplement Fig-2

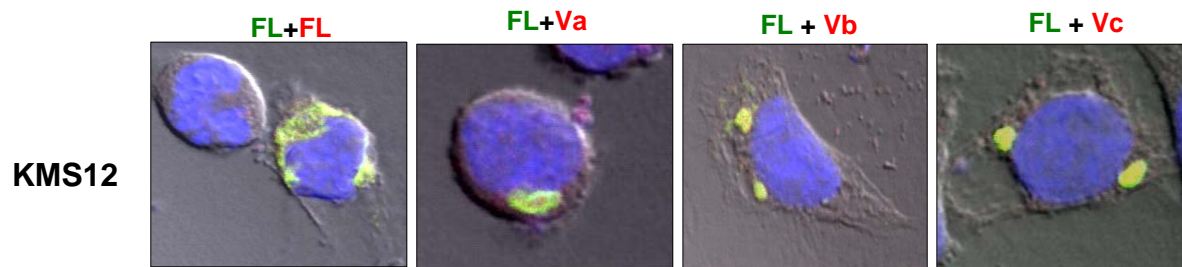

**Supplement Fig-3**

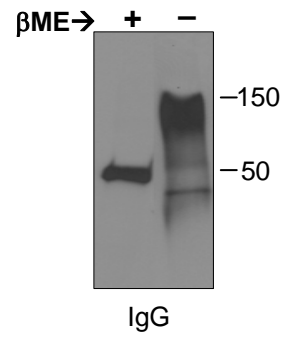

**Supplement Fig-4**
